# Supplementary material for: Moldable clay-like unit for synthesis of highly elastic polydimethylsiloxane sponge with nanofiller modification
Source: Royal Society of Chemistry journal article supplement (doi:10.1039/c6ra26701g), 2017-01-01
Supplement: c6ra26701g5.pdf [file c6ra26701g5.pdf]

## Supporting Information

### **Moldable clay-like unit for synthesis of highly elastic polydimethylsiloxane sponge with nanofiller modification**

Shi Qiu,<sup>a</sup> Hengchang Bi,<sup>a</sup> Xiaohui Hu,<sup>a</sup> Mingbo Wu,<sup>\*b</sup> Yongfeng Li<sup>c</sup> and Litao Sun<sup>\*a</sup>

---

a. SEU-FEI Nano-Pico Center, Key Laboratory of MEMS of Ministry of Education, Southeast University, Nanjing, 210096, P. R. China. E-mail: slt@seu.edu.cn

b. CPCIF Key Lab for Carbon Materials from Heavy Oil, State Key Laboratory of Heavy Oil Processing, China University of Petroleum, Qingdao, 266580, P. R. China. E-mail: wumb@upc.edu.cn

c. State Key Laboratory of Heavy Oil Processing, China University of Petroleum, Beijing 102249, P. R. China.

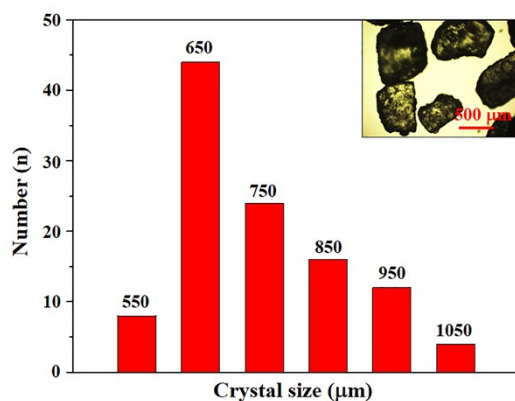

**Fig. S1** Plot showing size number distribution of commercial sea salt crystals and the corresponding optical microscope image of salt crystals.

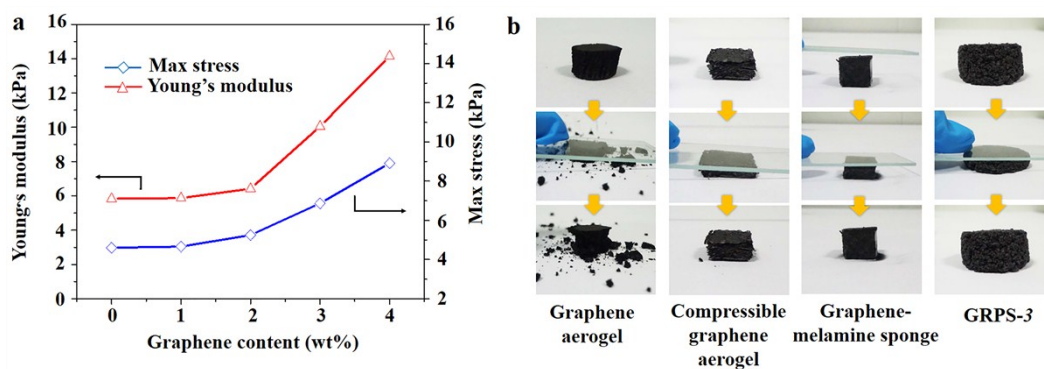

**Fig. S2** (a) The corresponding Young's modulus and ultimate stress for different graphene loading contents of GRPSs at 50% strain deformation. (b) Sequential photographs showing compression–recovery processes of the graphene-based sponges.

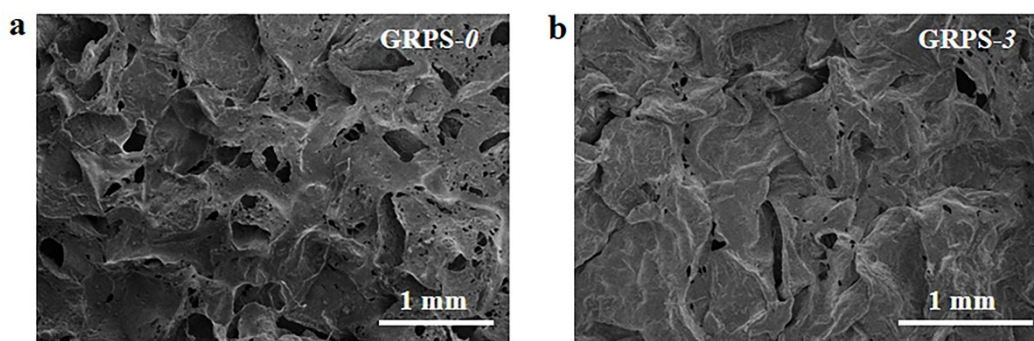

**Fig. S3** SEM images of the top surface structures of (a) GRPS-0 and (b) GRPS-3.

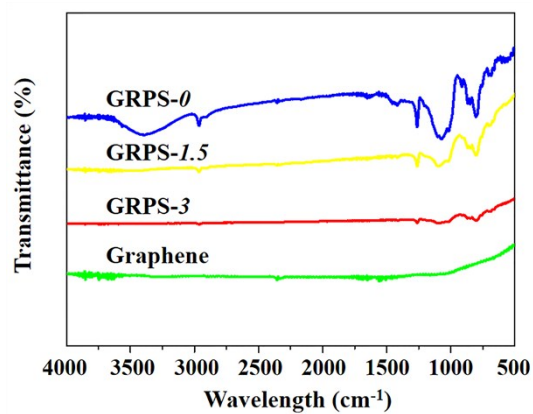

**Fig. S4** FTIR spectra of as-prepared GRPSs and graphene nanosheets.

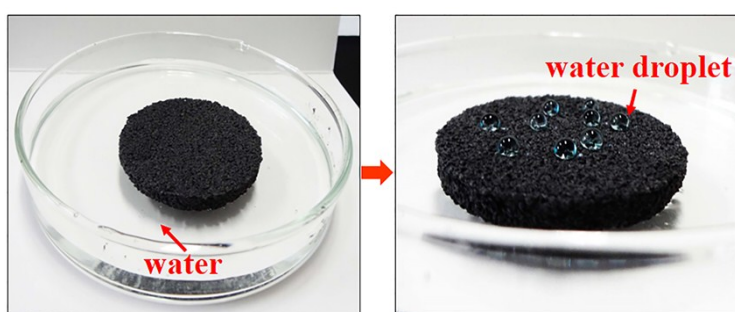

**Fig. S5** Photographs showing GRPS-3 can float on the water surface, and water droplets (dyed by methylene blue) can keep uniformly spherical shapes on the GRPS-3 surface.

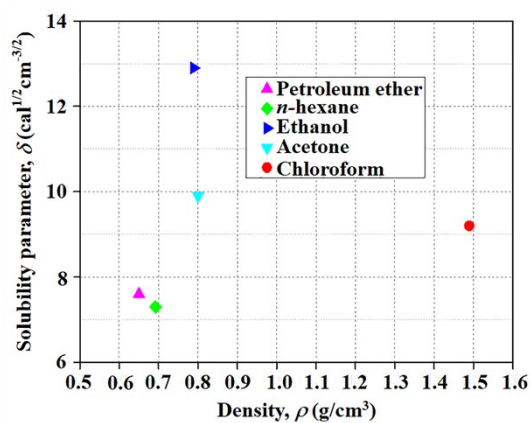

**Fig. S6** The relationship between density ( $\rho$ ) and solubility parameter ( $\delta$ ) of various solvents.

**Table S1.** Comparison of mechanical properties of typical PDMS sponges.

| Sample name                           | Synthetic method                            | Linear Elastic region (%) | Young's modulus (kPa) | Max stress at 50% strain (kPa) | Ref.     |
|---------------------------------------|---------------------------------------------|---------------------------|-----------------------|--------------------------------|----------|
| Porous PDMS sponge                    | Sugar leaching technique                    | ~20                       | ~600                  |                                | 1        |
| PDMS sponge                           | Vacuum-assisted sugar template method       |                           | ~20                   |                                | 2        |
| PDMS oil absorbent                    | Solvent evaporation method                  | ~30                       | ~5.56                 | ~3.33                          | 3        |
| Durable PDMS sponge                   | Salt-template approach                      | ~30                       | ~100                  | ~75                            | 4        |
| CNT-PDMS sponge                       | Post dip-coating method                     | ~20                       | ~169                  | ~39.44                         | 5        |
| Piezoelectric polymer composite foams | Sugar-template strategy via roll-out method | ~15                       | ~32                   |                                | 6        |
| PDMS/MWNT nanocomposite               | Solvent evaporation by piston motion        | ~20                       | ~157                  | ~197                           | 7        |
| Graphene-reinforced PDMS sponge       | Solvent evaporation by ultrasound           | ~30                       | 5.83~14.14            | 4.61~8.92                      | Our work |

**Table S2.** Comparison of mechanical properties of as-made GRPSs at different graphene loading contents.

| Sample name | Graphene content (wt%) | Young's modulus (kPa) | Max stress at 50% strain (kPa) | Energy loss coefficient        |                      |                      |
|-------------|------------------------|-----------------------|--------------------------------|--------------------------------|----------------------|----------------------|
|             |                        |                       |                                | $\square \varepsilon^a = 30\%$ | $\varepsilon = 50\%$ | $\varepsilon = 70\%$ |
| GRPS-0      | 0                      | 5.83                  | 4.61                           | 0.14                           | 0.16                 | 0.18                 |
| GRPS-1      | 1                      | 5.87                  | 4.66                           | 0.15                           | 0.19                 | 0.21                 |
| GRPS-2      | 2                      | 6.42                  | 5.25                           | 0.21                           | 0.24                 | 0.25                 |
| GRPS-3      | 3                      | 10.05                 | 6.87                           | 0.19                           | 0.23                 | 0.27                 |
| GRPS-4      | 4                      | 14.14                 | 8.92                           | 0.18                           | 0.23                 | 0.29                 |

a)  $\varepsilon$  means the strain deformation.

**Table S3.** Comparison of typical PDMS-based adsorbent sponges.

| Sample name                     | Synthetic method                           | Adsorption capacity <sup>a)</sup> (g g <sup>-1</sup> ) | Density (g cm <sup>-3</sup> ) | Porosity (%) | Swell ratio | Ref.      |
|---------------------------------|--------------------------------------------|--------------------------------------------------------|-------------------------------|--------------|-------------|-----------|
| PDMS sponge                     | Vacuum-assisted polymerization             | 13.8                                                   | 0.12                          | 83           | 1.5         | 2         |
| PDMS oil absorbent              | Evaporation-induced polymerization         | 20.8                                                   | 0.18                          | 81           | 6.0         | 3         |
| Graphene-reinforced PDMS sponge | Ultrasound-assisted in situ polymerization | 11.7                                                   | 0.14                          | 80           | 2.7         | This work |

a) The adsorbed oil is petroleum ether.

## **Experiment S1.**

### ***Preparation of Graphene Aerogel and Compressible Graphene Aerogel***

Graphene aerogel (GA) and compressible graphene aerogel (CGA) were prepared by hydrothermal method described elsewhere in reported work.<sup>8</sup> 60 mg GO (graphene oxide) was dispersed in 20 mL ammonia solution, followed by sonication for 15 min. The dark brown colloidal dispersion was transferred to a sealed reactor, heated at 180 °C for 20 h, and then cooled down to room temperature. The as-prepared graphene gels were subsequently freeze-dried at minus 20 °C and minus 170 °C for 48 h to obtain GA and CGA, respectively.

### ***Preparation of Graphene-Melamine Sponge***

Graphene-melamine sponge was prepared by a dip-coating method described elsewhere in detail.<sup>9</sup> 0.1 g commercial melamine sponge was dipped into the graphene dispersion in ethanol solution. Graphene nanosheets physically coated onto the sponge skeleton by capillary action. After being dried in the vacuum oven at 100 °C for 2 h, the graphene-melamine sponge was obtained. The repeated steps of the infiltration process were carried out to guarantee melamine sponge uniformly coated with graphene nanosheets.

## References

- 1 K. J. Cha and D. S. Kim, *Biomed. Microdevices*, 2011, **13**, 877–883.
- 2 S. J. Choi, T. H. Kwon, H. Im, D. I. Moon, D. J. Baek, M. L. Seol, J. P. Duarte and Y. K. Choi, *ACS Appl. Mater. Interfaces*, 2011, **3**, 4552–4556.
- 3 A. Zhang, M. Chen, C. Du, H. Guo, H. Bai and L. Li, *ACS Appl. Mater. Interfaces*, 2013, **5**, 10201–10206.
- 4 X. Zhao, L. Li, B. Li, J. Zhang and A. Wang, *J. Mater. Chem. A*, 2014, **2**, 18281–18287.
- 5 J. W. Han, B. Kim, J. Li and M. Meyyappan, *Appl. Phys. Lett.*, 2013, **102**, 051903–051906.
- 6 W. R. McCall, K. Kim, C. Heath, G. La Pierre and D. J. Sirbuly, *ACS Appl. Mater. Interfaces*, 2014, **6**, 19504–19509.
- 7 A. Turco, C. Malitesta, G. Barillaro, A. Greco, A. Maffezzoli and E. Mazzotta, *J. Mater. Chem. A*, 2015, **3**, 17685–17696.
- 8 X. Xie, Y. Zhou, H. Bi, K. Yin, S. Wan and L. Sun, *Sci. Rep.*, 2013, **3**, 2117–2122.
- 9 D. D. Nguyen, N. H. Tai, S. B. Lee and W. S. Kuo, *Energy Environ. Sci.*, 2012, **5**, 7908–7912.
